# Supplementary material
Source: PubMed Central journal article supplement (PMC7011733)
Supplement: cs9b02195_si_001.pdf [file cs9b02195_si_001.pdf]

## Supporting Information

Tunable Covalent Triazine-Based Frameworks (CTF-0) for Visible Light-Driven Hydrogen and Oxygen Generation from Water Splitting

*Dan Kong,<sup>a</sup> Xiaoyu Han,<sup>b</sup> Jijia Xie,<sup>a</sup> Qiushi Ruan,<sup>a</sup> Christopher D. Windle,<sup>a</sup> Srinivas Gadipelli,<sup>b</sup> Kai Shen,<sup>c</sup> Zhiming Bai,<sup>a,d,\*</sup> Zhengxiao Guo,<sup>b,\*</sup> Junwang Tang<sup>a,\*</sup>*

<sup>a</sup>Department of Chemical Engineering, University College London, Torrington Place, London, WC1E 7JE, UK.

<sup>b</sup>Department of Chemistry, University College London, 20 Gordon St, London, WC1H 0AJ, UK.

<sup>c</sup>Department of Electronic and Electrical Engineering, University College London, Torrington Place, London WC1E 7JE, UK.

<sup>d</sup>The school of Material Science and Engineering, Beihang University, No.37 Xueyuan Road, Haidian district, Beijing, China.

\*Corresponding Author E-mails: [junwang.tang@ucl.ac.uk](mailto:junwang.tang@ucl.ac.uk); [z.x.guo@ucl.ac.uk](mailto:z.x.guo@ucl.ac.uk);

[bzm@buaa.edu.cn](mailto:bzm@buaa.edu.cn)

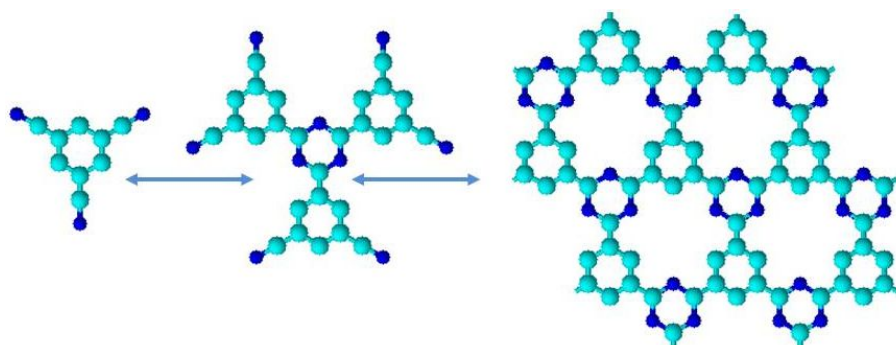

**Scheme S1.** Polymerization reaction of 1,3,5-tricyanobenzene to an intermediate trimer and the ideal extended CTF-0.

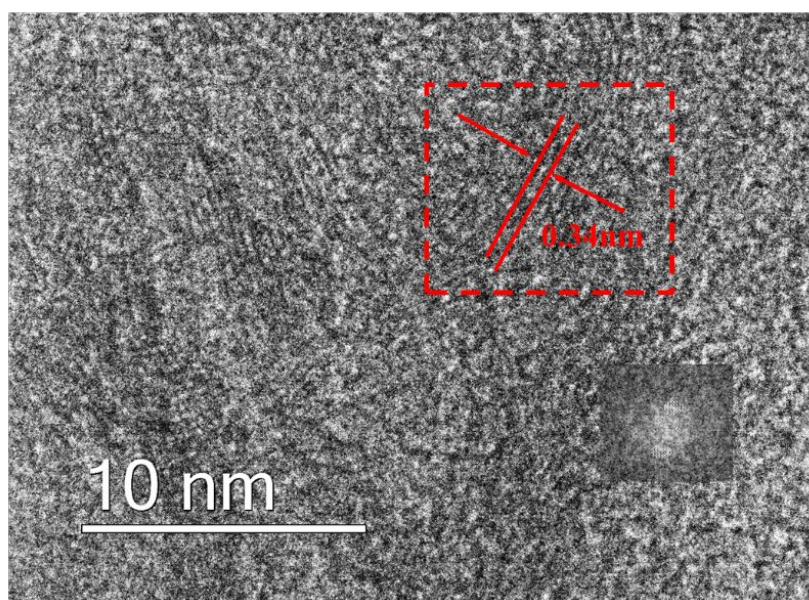

**Figure S1.** Transmission electron microscopy (TEM) image of CTF-0-M<sub>2</sub>.

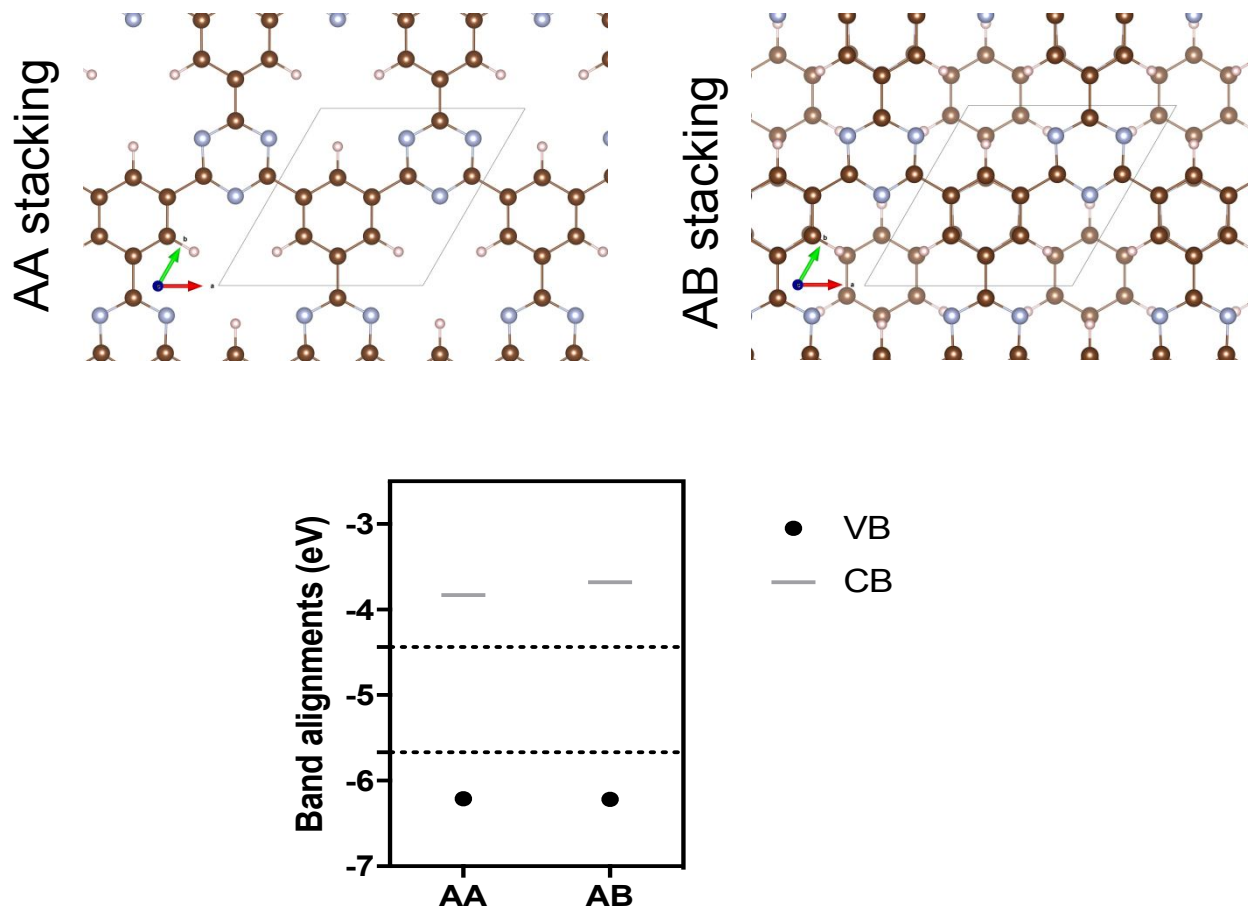

**Figure S2** Estimated band positions of CTF-0 with three-layer AA stacking and AB stacking.

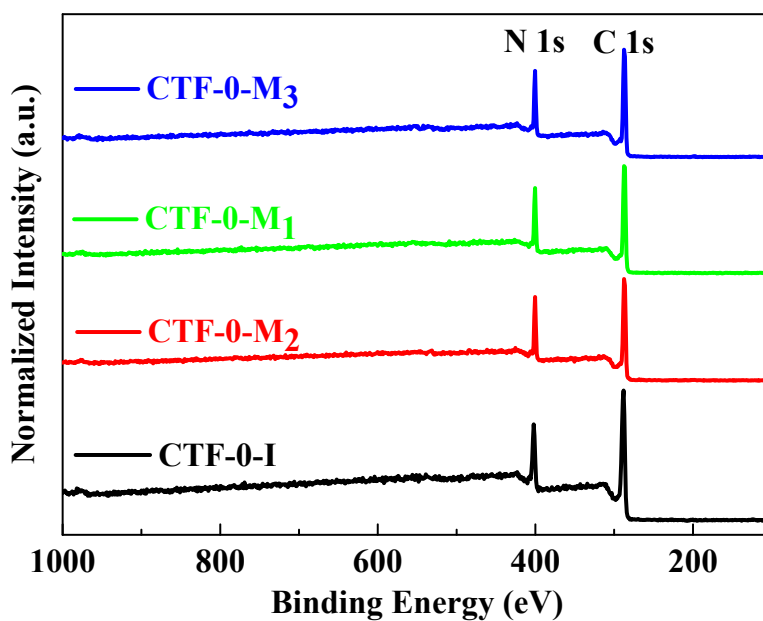

**Figure S3.** XPS survey spectra of CTF-0-I, CTF-0-M<sub>1</sub>, CTF-0-M<sub>2</sub> and CTF-0-M<sub>3</sub>.

**Table S1.** Elemental analysis data of the polymers CTF-0-I, CTF-0-M<sub>1</sub>, CTF-0-M<sub>2</sub> and CTF-0-M<sub>3</sub>.

| Polymer              | Acid catalyst | TCB | Experimental % |     |      |      | Theory % |     |      |
|----------------------|---------------|-----|----------------|-----|------|------|----------|-----|------|
|                      |               |     | C              | H   | N    | N/C  | C        | H   | N    |
| CTF-0-I              | 0.9 g         | 1 g | 76.8           | 2.5 | 20.0 | 0.26 | 70.6     | 2.0 | 27.4 |
| CTF-0-M <sub>2</sub> | 2 mL          | 1 g | 71.4           | 2.0 | 26.3 | 0.36 | 70.6     | 2.0 | 27.4 |
| CTF-0-M <sub>1</sub> | 1.5 mL        | 1 g | 72.1           | 2.1 | 25.3 | 0.35 | 70.6     | 2.0 | 27.4 |
| CTF-0-M <sub>3</sub> | 2.5 mL        | 1 g | 72.3           | 2.2 | 24.8 | 0.34 | 70.6     | 2.0 | 27.4 |

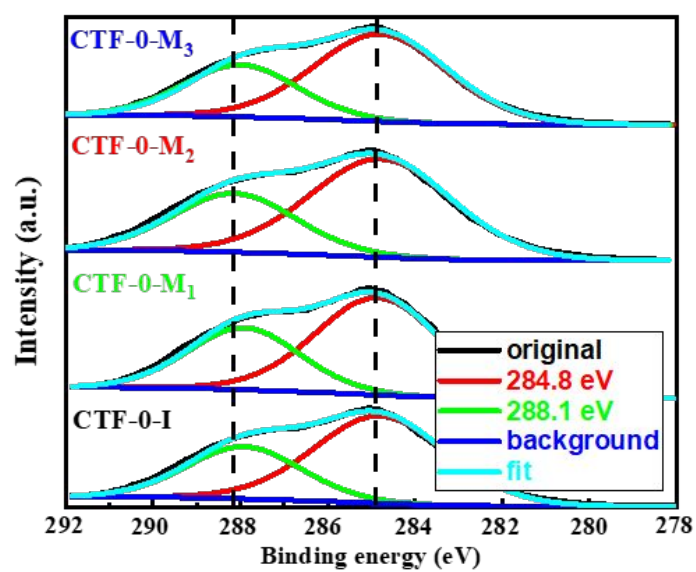

**Figure S4.** C1s XPS spectra with applied peak and cumulative fits of CTF-0-I, CTF-0-M<sub>1</sub>, CTF-0-M<sub>2</sub>, and CTF-0-M<sub>3</sub>.

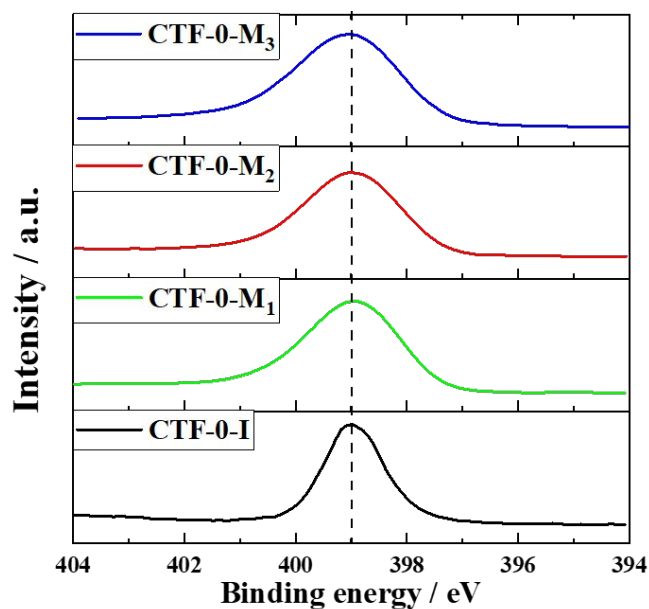

**Figure S5.** N1s XPS spectra with applied peak and cumulative fits of CTF-0-I, CTF-0-M<sub>1</sub>, CTF-0-M<sub>2</sub>, and CTF-0-M<sub>3</sub>.

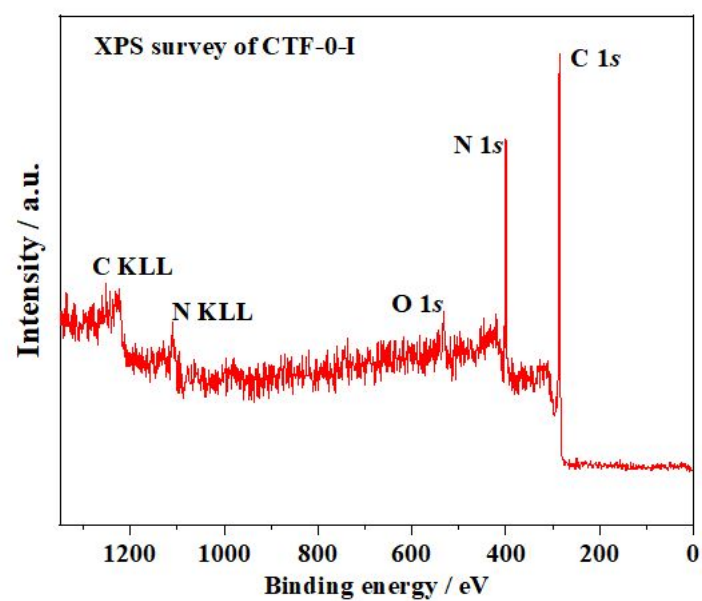

Figure S6. XPS survey spectra of CTF-0-I.

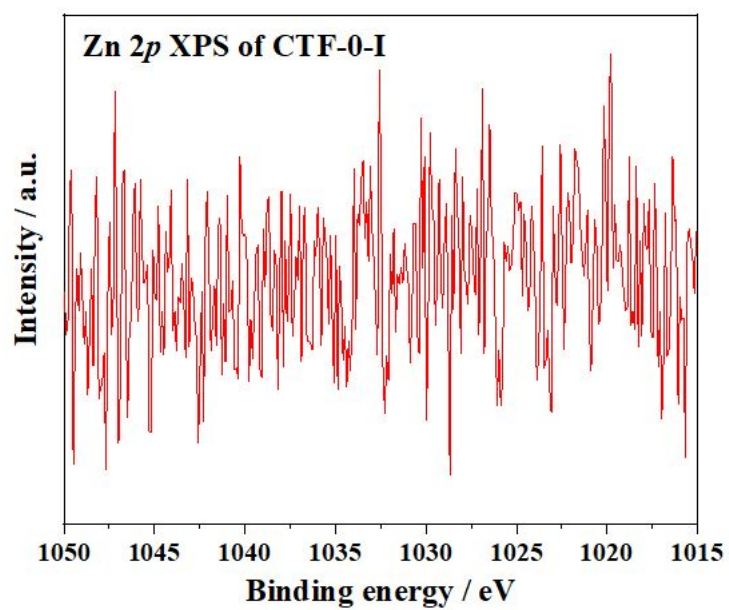

Figure S7. Zn 2p XPS spectrum of CTF-0-I

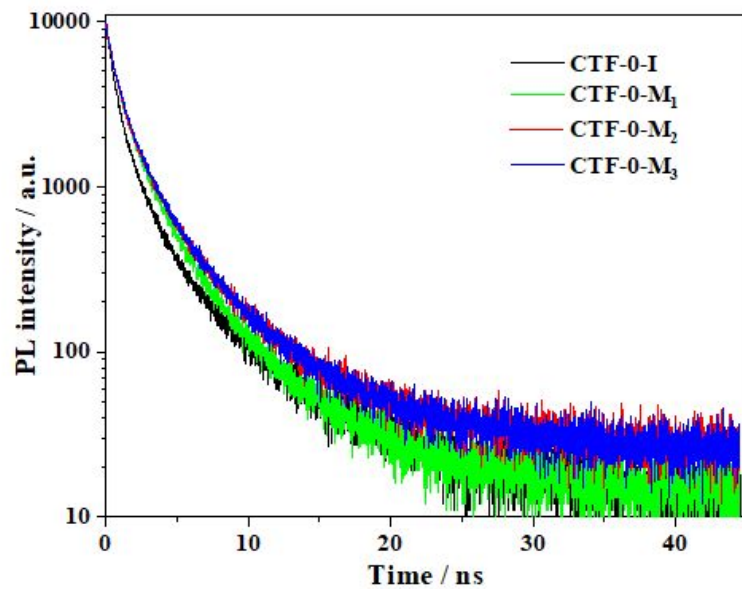

**Figure S8.** Log-linear plot of time-resolved photoluminescence

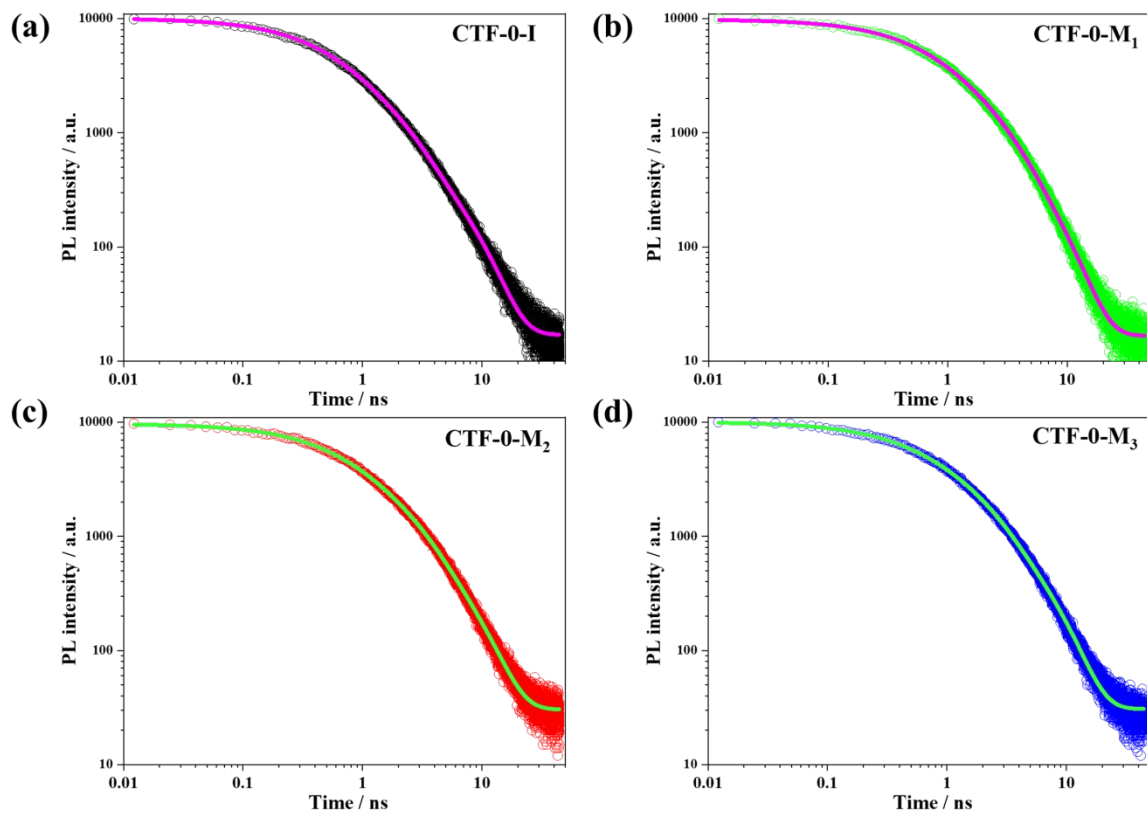

**Figure S9.** Triple-exponential fits to PL kinetics

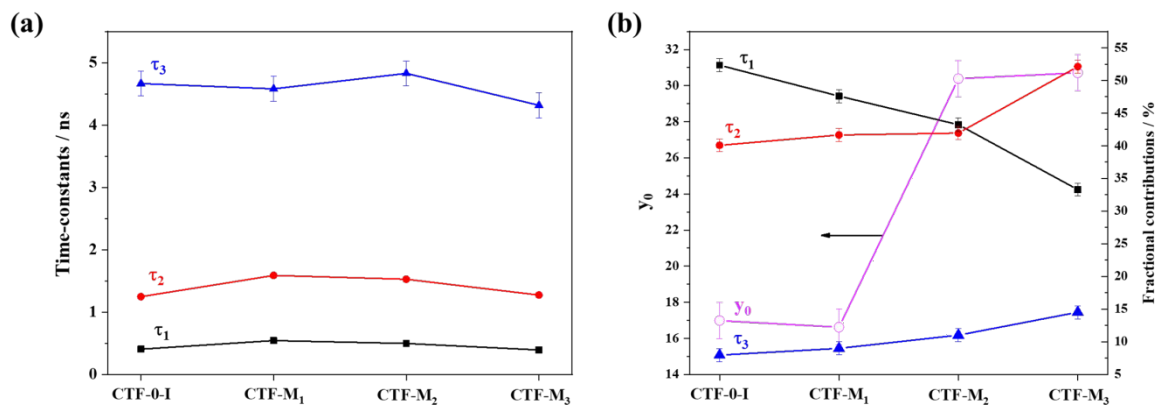

**Figure S10.** Fitting parameters of PL kinetics

**Table S2** Fitting parameters of PL kinetics

| Sample               | $\tau_1$ (contribution) / ns (%) | $\tau_2$ (contribution) / ns (%) | $\tau_3$ (contribution) / ns (%) | $y_0$ / ns | $\tau_{\text{average}}$ / ns |
|----------------------|----------------------------------|----------------------------------|----------------------------------|------------|------------------------------|
| CTF-0-I              | 0.41 (52)                        | 1.25 (40)                        | 4.66 (8)                         | 17.0       | 1.09                         |
| CTF-0-M <sub>1</sub> | 0.54 (48)                        | 1.59 (42)                        | 4.58 (9)                         | 16.6       | 1.34                         |
| CTF-0-M <sub>2</sub> | 0.50 (43)                        | 1.53 (42)                        | 4.82 (11)                        | 30.4       | 1.39                         |
| CTF-0-M <sub>3</sub> | 0.39 (33)                        | 1.27 (52)                        | 4.32 (15)                        | 30.7       | 1.44                         |

$y_0$  represents y-offset which can be interpreted as a long-lived PL component with time-constant.



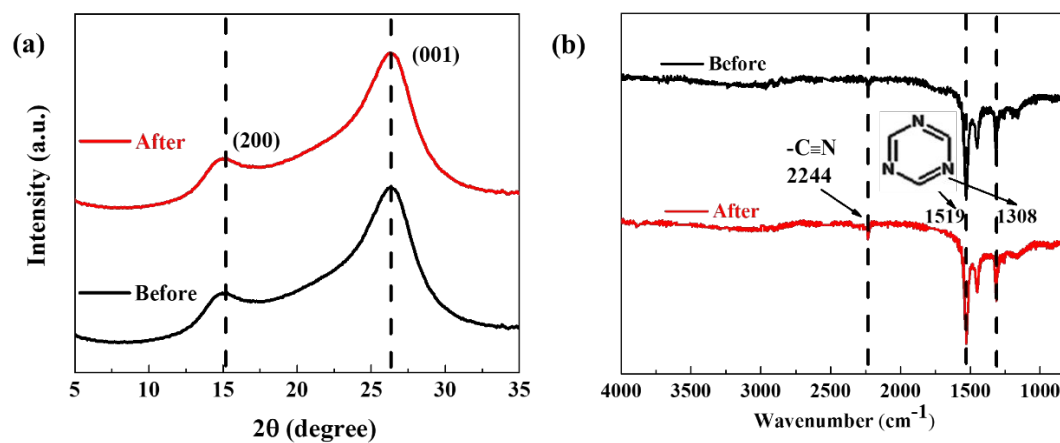

**Figure S11.** XRD patterns (a) and FTIR spectra (b) of CTF-0-M<sub>2</sub> before and after photocatalytic reactions.

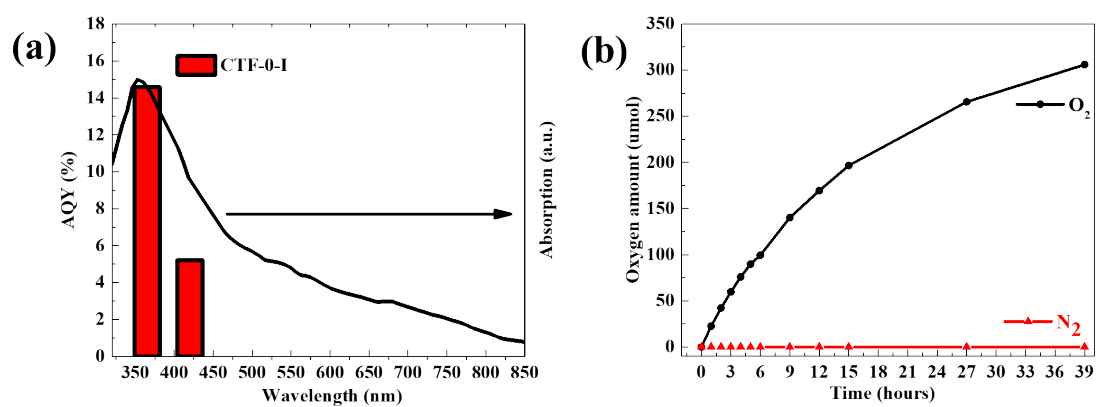

**Figure S12.** (a) Apparent quantum yield (AQY) for oxygen generation and (b) Stability test of CTF-0-I under ambient conditions.

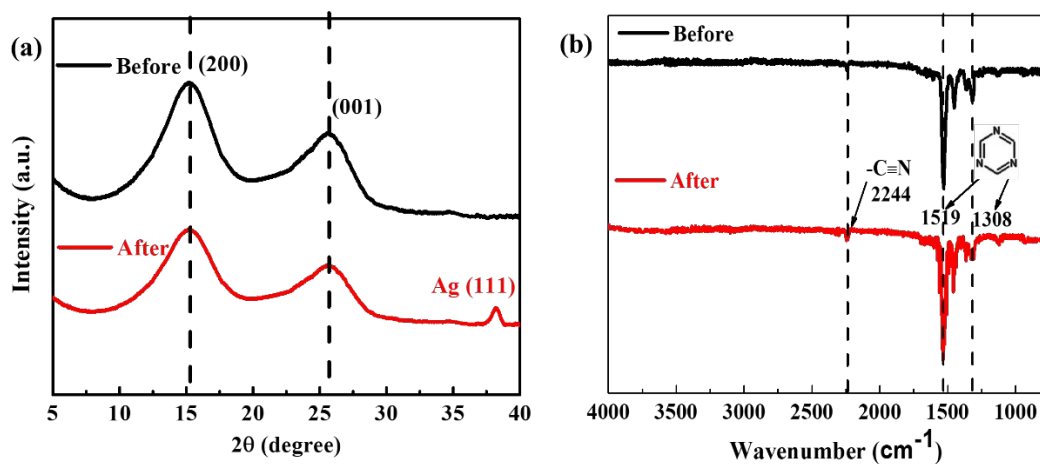

**Figure S13.** XRD patterns (a) and FTIR spectra (b) of CTF-0-I before and after photocatalytic water oxidation reactions.

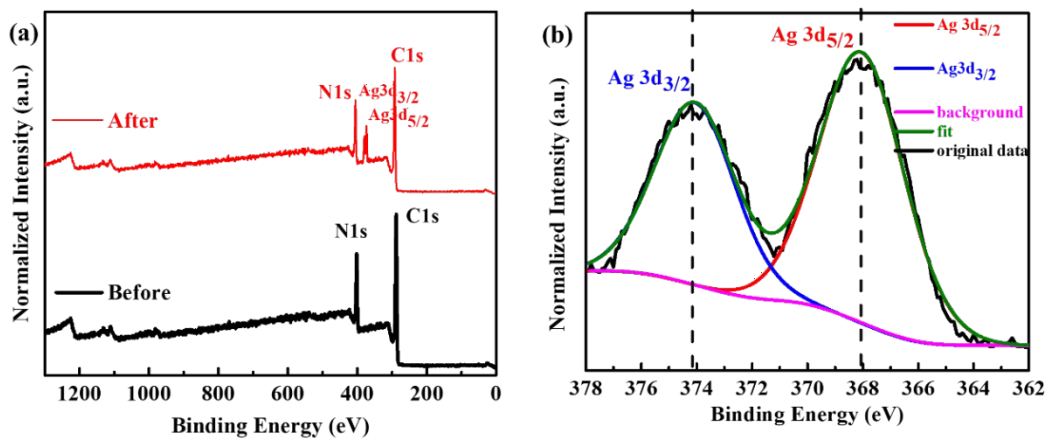

**Figure S14.** XPS survey spectra of CTF-0-I before and after photocatalytic reactions (a) and Ag 3d XPS spectra of CTF-0-I after photocatalytic reaction (b). Charge referenced to adventitious C1s peak at 284.8 eV.0

**Table S3.** Nitrile rings to benzene rings ratio according to the  $^{13}\text{C}$  ssNMR spectra of the polymers CTF-0-I, CTF-0-M<sub>1</sub>, CTF-0-M<sub>2</sub> and CTF-0-M<sub>3</sub>.

| Polymer              | Amount of Lewis acid | TCB | Nitrile to benzene ratio |
|----------------------|----------------------|-----|--------------------------|
| CTF-0-I              | 0.9 g                | 1 g | 0.91                     |
| CTF-0-M <sub>2</sub> | 2 mL                 | 1 g | 1.23                     |
| CTF-0-M <sub>1</sub> | 1.5 mL               | 1 g | 0.79                     |
| CTF-0-M <sub>3</sub> | 2.5 mL               | 1 g | 0.15                     |

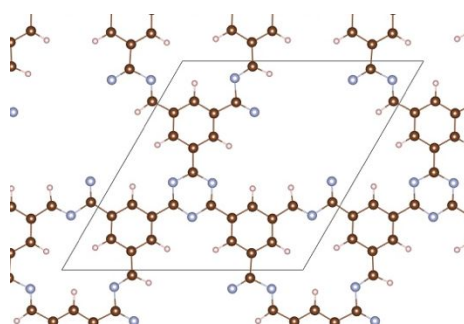

**Figure S15.** The CTF-0 with the unreacted CN terminals. The model was built on a 2×2 supercell with distracting one 1,3,5-tricyanobenzene group.

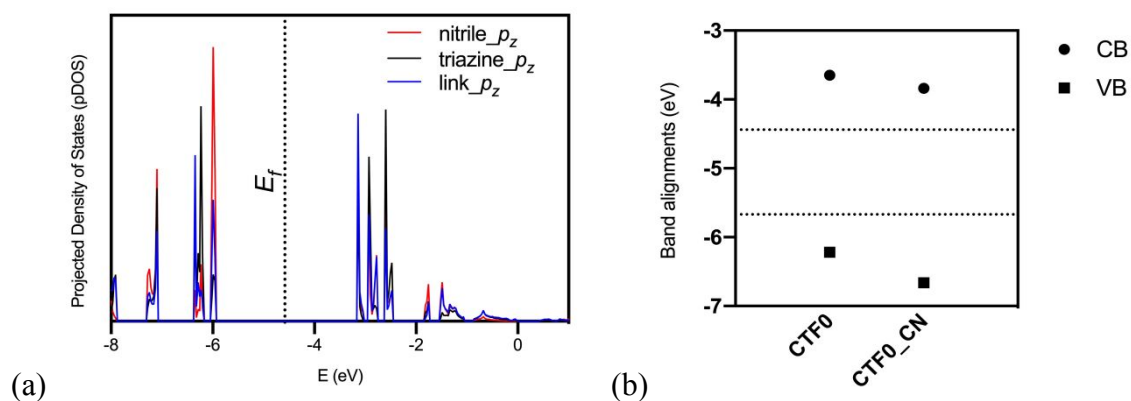

**Figure S16.** (a) The projected Density of States of different N in the CTF-0 with nitrile framework. The dot line represents the Fermi level. (b) The calculated band alignments of pristine CTF-0 and CTF-0 with nitrile terminals in the framework.

**Table S4.** The detailed parameters for calculating AQY data.

| AQY of Hydrogen evolution                              |       |       |      |      |
|--------------------------------------------------------|-------|-------|------|------|
| wavelength(nm)                                         | 365   | 420   | 500  | 600  |
| light intensity (mw/cm <sup>2</sup> )                  | 1.58  | 1.25  | 1.82 | 1.93 |
| the amount of gas (μmol)                               | 18.7  | 11.96 | 5.08 | 1.94 |
| AQY (%)                                                | 10.98 | 7.72  | 1.89 | 0.57 |
| AQY of Oxygen evolution                                |       |       |      |      |
| wavelength(nm)                                         | 365   | 420   |      |      |
| light intensity (mw/cm <sup>2</sup> )                  | 1.16  | 1.01  |      |      |
| the amount of gas (μmol)                               | 9.17  | 3.25  |      |      |
| AQY (%)                                                | 14.59 | 5.21  |      |      |
| Both reactions have the same irradiation time and area |       |       |      |      |
| irradiation area(cm <sup>2</sup> )                     | 19.63 |       |      |      |
| irradiation time(s)                                    | 3600  |       |      |      |
